# Supplementary material for: Exploring pregnant individuals’ counseling needs regarding urgent imaging to rule out pulmonary embolism
Source: PubMed Central journal article supplement — Res Pract Thromb Haemost. 2024 Jan 17;8(2):102317. doi: 10.1016/j.rpth.2024.102317 (PMC10943056; doi:10.1016/j.rpth.2024.102317), 2024-01-17
Supplement: mmc2.pdf [file mmc2.pdf]

## Supplemental Appendix 2. COREQ checklist

### Consolidated criteria for reporting qualitative studies (COREQ): 32-item checklist

Developed from:

Tong A, Sainsbury P, Craig J. Consolidated criteria for reporting qualitative research (COREQ): a 32-item checklist for interviews and focus groups. *International Journal for Quality in Health Care*. 2007. Volume 19, Number 6: pp. 349 – 357

| No. Item                                       | Guide questions/description                                                                                                                | Reported on Page # |
|------------------------------------------------|--------------------------------------------------------------------------------------------------------------------------------------------|--------------------|
| <b>Domain 1: Research team and reflexivity</b> |                                                                                                                                            |                    |
| <i>Personal Characteristics</i>                |                                                                                                                                            |                    |
| 1. Inter viewer/facilitator                    | Which author/s conducted the inter view or focus group?                                                                                    | 5                  |
| 2. Credentials                                 | What were the researcher’s credentials? E.g. PhD, MD                                                                                       | 5                  |
| 3. Occupation                                  | What was their occupation at the time of the study?                                                                                        | 5                  |
| 4. Gender                                      | Was the researcher male or female?                                                                                                         | 5                  |
| 5. Experience and training                     | What experience or training did the researcher have?                                                                                       | 5                  |
| <i>Relationship with participants</i>          |                                                                                                                                            |                    |
| 6. Relationship established                    | Was a relationship established prior to study commencement?                                                                                | 5 (No)             |
| 7. Participant knowledge of the interviewer    | What did the participants know about the researcher? e.g. personal goals, reasons for doing the research                                   | 4, 5               |
| 8. Interviewer characteristics                 | What characteristics were reported about the inter viewer/facilitator? e.g. Bias, assumptions, reasons and interests in the research topic | 5                  |

|                                          |                                                                                                                                                          |                            |
|------------------------------------------|----------------------------------------------------------------------------------------------------------------------------------------------------------|----------------------------|
| <b>Domain 2: study design</b>            |                                                                                                                                                          |                            |
| <i>Theoretical framework</i>             |                                                                                                                                                          |                            |
| 9. Methodological orientation and Theory | What methodological orientation was stated to underpin the study? e.g. grounded theory, discourse analysis, ethnography, phenomenology, content analysis | 4                          |
| <i>Participant selection</i>             |                                                                                                                                                          |                            |
| 10. Sampling                             | How were participants selected? e.g. purposive, convenience, consecutive, snowball                                                                       | 4, 5                       |
| 11. Method of approach                   | How were participants approached? e.g. face-to-face, telephone, mail, email                                                                              | 4                          |
| 12. Sample size                          | How many participants were in the study?                                                                                                                 | 6                          |
| 13. Non-participation                    | How many people refused to participate or dropped out? Reasons?                                                                                          | 7                          |
| <i>Setting</i>                           |                                                                                                                                                          |                            |
| 14. Setting of data collection           | Where was the data collected? e.g. home, clinic, workplace                                                                                               | 5, 6                       |
| 15. Presence of non-participants         | Was anyone else present besides the participants and researchers?                                                                                        | N/A (no non-participants)  |
| 16. Description of sample                | What are the important characteristics of the sample? e.g. demographic data, date                                                                        | 8                          |
| <i>Data collection</i>                   |                                                                                                                                                          |                            |
| 17. Interview guide                      | Were questions, prompts, guides provided by the authors? Was it pilot tested?                                                                            | 6, Supplemental appendix 1 |
| 18. Repeat interviews                    | Were repeat interviews carried out? If yes, how many?                                                                                                    | No                         |
| 19. Audio/visual recording               | Did the research use audio or visual recording to collect the data?                                                                                      | 6                          |

|                                        |                                                                                                                                 |                               |
|----------------------------------------|---------------------------------------------------------------------------------------------------------------------------------|-------------------------------|
| 20. Field notes                        | Were field notes made during and/or after the inter view or focus group?                                                        | No                            |
| 21. Duration                           | What was the duration of the inter views or focus group?                                                                        | 7                             |
| 22. Data saturation                    | Was data saturation discussed?                                                                                                  | 7                             |
| 23. Transcripts returned               | Were transcripts returned to participants for comment and/or correction?                                                        | No                            |
| <b>Domain 3: analysis and findings</b> |                                                                                                                                 |                               |
| <i>Data analysis</i>                   |                                                                                                                                 |                               |
| 24. Number of data coders              | How many data coders coded the data?                                                                                            | 7                             |
| 25. Description of the coding tree     | Did authors provide a description of the coding tree?                                                                           | 16                            |
| 26. Derivation of themes               | Were themes identified in advance or derived from the data?                                                                     | 5, 7                          |
| 27. Software                           | What software, if applicable, was used to manage the data?                                                                      | 6, 7                          |
| 28. Participant checking               | Did participants provide feedback on the findings?                                                                              | No                            |
| <i>Reporting</i>                       |                                                                                                                                 |                               |
| 29. Quotations presented               | Were participant quotations presented to illustrate the themes/findings? Was each quotation identified? e.g. participant number | 9-14, supplemental appendix 3 |
| 30. Data and findings consistent       | Was there consistency between the data presented and the findings?                                                              | 9-16, supplemental appendix 3 |
| 31. Clarity of major themes            | Were major themes clearly presented in the findings?                                                                            | 9-16, supplemental appendix 3 |
| 32. Clarity of minor themes            | Is there a description of diverse cases or discussion of minor themes?                                                          | 9-16, supplemental appendix 3 |
